# Supplementary material for: Interpregnancy interval and perinatal outcomes across Latin America from 1990 to 2009: a large multi‐country study
Source: PubMed Central journal article supplement (PMC4949506; doi:10.1111/1471-0528.13625), 2015-09-24
Supplement: BJO-123-730-s001.pdf [file BJO-123-730-s001.pdf]

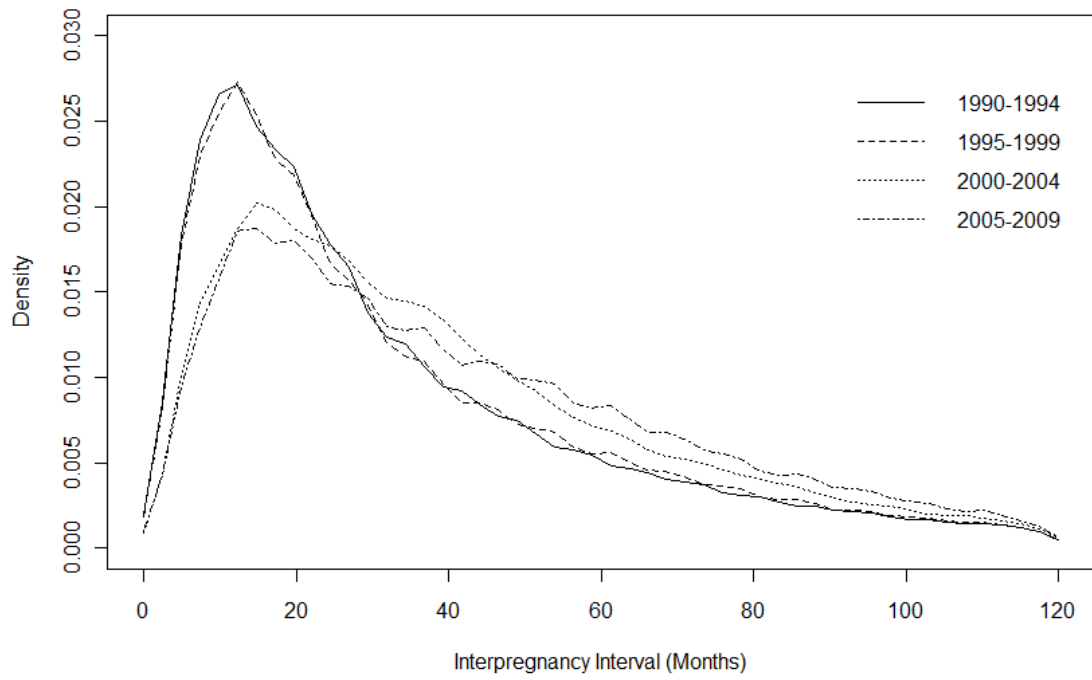

**Figure S1.** Distribution of interpregnancy intervals (in months) in a cohort of 894,476 women delivering two consecutive infants by 5-year time periods 1990-2009.
