# Supplementary material for: Interpregnancy interval and perinatal outcomes across Latin America from 1990 to 2009: a large multi‐country study
Source: PubMed Central journal article supplement (PMC4949506; doi:10.1111/1471-0528.13625), 2015-09-24
Supplement: BJO-123-730-s002.pdf [file BJO-123-730-s002.pdf]

**Table S1.** Distribution of sociodemographic and obstetric characteristics according to interpregnancy interval in a cohort of 894,476 women delivering two consecutive infants 1990-2009

| N (%)                     | Interpregnancy interval (months) |                  |                  |                  |                 |                  |                 |                 |                 |                 |
|---------------------------|----------------------------------|------------------|------------------|------------------|-----------------|------------------|-----------------|-----------------|-----------------|-----------------|
|                           | 3-11                             | 12-23            | 24-35            | 36-47            | 48-59           | 60-71            | 72-83           | 84-95           | 96-107          | 108-119         |
|                           | 155958<br>(17.4)                 | 228455<br>(25.6) | 151240<br>(16.9) | 107392<br>(12.0) | 80090<br>(9.0)  | 59188<br>(6.6)   | 43098<br>(4.8)  | 30698<br>(3.4)  | 22034<br>(2.5)  | 16323<br>(1.8)  |
| Maternal age (years)      |                                  |                  |                  |                  |                 |                  |                 |                 |                 |                 |
| <17                       | 3129<br>(2.0)                    | 2086<br>(0.9)    | 506<br>(0.3)     | 164<br>(0.2)     | 67<br>(0.1)     | 51<br>(0.1)      | 21<br>(0.1)     | 14<br>(0.1)     | 9<br>(0.0)      | 5<br>(0.0)      |
| 17-19                     | 22260<br>(14.3)                  | 25000<br>(10.9)  | 10395<br>(6.9)   | 3745<br>(3.5)    | 1094<br>(1.4)   | 360<br>(0.6)     | 143<br>(0.3)    | 72<br>(0.2)     | 53<br>(0.2)     | 28<br>(0.2)     |
| 20-24                     | 54266<br>(34.8)                  | 77955<br>(34.1)  | 50266<br>(33.2)  | 33109<br>(30.8)  | 20304<br>(25.4) | 11035<br>(18.6)  | 5371<br>(12.5)  | 2169<br>(7.1)   | 796<br>(3.6)    | 365<br>(2.2)    |
| 25-29                     | 38285<br>(24.6)                  | 59779<br>(26.2)  | 43163<br>(28.6)  | 33892<br>(31.6)  | 27920<br>(34.9) | 21293<br>(36.0)  | 15369<br>(35.7) | 10066<br>(32.8) | 6314<br>(28.7)  | 3723<br>(22.8)  |
| 30-34                     | 23356<br>(15.0)                  | 37765<br>(16.5)  | 27439<br>(18.1)  | 21917<br>(20.4)  | 18432<br>(23.0) | 15685<br>(26.5)  | 12733<br>(29.5) | 10365<br>(33.8) | 8099<br>(36.8)  | 6301<br>(38.6)  |
| >34                       | 13945<br>(8.9)                   | 24666<br>(10.8)  | 18643<br>(12.3)  | 13938<br>(13.0)  | 11766<br>(14.7) | 10377<br>(17.53) | 9184<br>(21.3)  | 7809<br>(25.4)  | 6601<br>(30.0)  | 5776<br>(35.4)  |
| Missing data              | 717<br>(0.5)                     | 1204<br>(0.5)    | 828<br>(0.6)     | 627<br>(0.6)     | 507<br>(0.6)    | 387<br>(0.7)     | 277<br>(0.6)    | 203<br>(0.7)    | 162<br>(0.7)    | 125<br>(0.8)    |
| No of previous deliveries |                                  |                  |                  |                  |                 |                  |                 |                 |                 |                 |
| 0                         | 7896<br>(5.06)                   | 15554<br>(6.8)   | 13246<br>(8.7)   | 11457<br>(10.7)  | 9585<br>(11.9)  | 7532<br>(12.7)   | 5334<br>(12.4)  | 3536<br>(11.5)  | 2342<br>(10.6)  | 1605<br>(9.8)   |
| 1-3                       | 109556<br>(70.2)                 | 155447<br>(68.0) | 104075<br>(68.8) | 74720<br>(69.6)  | 55574<br>(69.4) | 40703<br>(68.8)  | 29610<br>(68.7) | 21295<br>(69.4) | 15366<br>(69.7) | 11449<br>(70.4) |
| >4                        | 38382<br>(24.6)                  | 57306<br>(25.0)  | 33835<br>(22.4)  | 21155<br>(19.7)  | 14907<br>(18.6) | 10935<br>(18.5)  | 8139<br>(18.9)  | 5855<br>(19.0)  | 4320<br>(19.6)  | 3260<br>(20.0)  |
| Missing data              | 124<br>(0.08)                    | 148<br>(0.06)    | 84<br>(0.06)     | 60<br>(0.06)     | 24<br>(0.03)    | 18<br>(0.03)     | 15<br>(0.03)    | 12<br>(0.04)    | 6<br>(0.03)     | 9<br>(0.06)     |
| History of miscarriage    |                                  |                  |                  |                  |                 |                  |                 |                 |                 |                 |
| Yes                       | 39482<br>(25.3)                  | 49640<br>(21.7)  | 32583<br>(21.5)  | 22934<br>(21.4)  | 17219<br>(21.5) | 12890<br>(21.8)  | 9853<br>(22.9)  | 7251<br>(23.6)  | 5307<br>(24.0)  | 4205<br>(25.8)  |
| No                        | 113218<br>(72.6)                 | 173442<br>(75.9) | 115002<br>(76.0) | 81823<br>(76.2)  | 60938<br>(76.0) | 44819<br>(75.7)  | 32222<br>(74.8) | 22661<br>(73.8) | 16161<br>(73.3) | 11722<br>(71.8) |
| Missing data              | 3258<br>(2.09)                   | 5373<br>(2.35)   | 3655<br>(2.42)   | 2635<br>(2.45)   | 1933<br>(2.41)  | 1479<br>(2.50)   | 1023<br>(2.37)  | 786<br>(2.56)   | 566<br>(2.57)   | 396<br>(2.43)   |
| History of fetal death    |                                  |                  |                  |                  |                 |                  |                 |                 |                 |                 |
| Yes                       | 10835<br>(6.95)                  | 12763<br>(5.6)   | 7331<br>(4.8)    | 4496<br>(4.2)    | 3174<br>(3.9)   | 2137<br>(3.6)    | 1543<br>(3.6)   | 1094<br>(3.6)   | 808<br>(3.7)    | 576<br>(3.5)    |
| No                        | 136918<br>(87.8)                 | 203305<br>(89)   | 135533<br>(89.6) | 96708<br>(90.0)  | 72341<br>(90.3) | 53566<br>(90.5)  | 38988<br>(90.5) | 27690<br>(90.2) | 19854<br>(90.1) | 14720<br>(90.2) |
| Unknown                   | 8205<br>(5.3)                    | 12387<br>(5.4)   | 8376<br>(5.5)    | 6188<br>(5.8)    | 4575<br>(5.7)   | 3485<br>(5.9)    | 2567<br>(5.9)   | 1914<br>(6.2)   | 1372<br>(6.2)   | 1027<br>(6.3)   |

Mother's education

|            |                 |                  |                 |                 |                 |                 |                 |                 |                 |                |
|------------|-----------------|------------------|-----------------|-----------------|-----------------|-----------------|-----------------|-----------------|-----------------|----------------|
| None       | 6064<br>(3.9)   | 12315<br>(5.4)   | 8257<br>(5.5)   | 5707<br>(5.3)   | 4352<br>(5.4)   | 3004<br>(5.1)   | 2161<br>(5.0)   | 1527<br>(5.0)   | 949<br>(4.3)    | 664<br>(4.1)   |
| Primary    | 77664<br>(49.8) | 114549<br>(50.1) | 72880<br>(48.2) | 50232<br>(46.8) | 37046<br>(46.3) | 27265<br>(46.1) | 19791<br>(45.9) | 13985<br>(45.6) | 10072<br>(45.7) | 7312<br>(44.8) |
| Secondary  | 59622<br>(38.2) | 83039<br>(36.3)  | 56832<br>(37.6) | 41927<br>(39.0) | 31479<br>(39.3) | 23657<br>(40.0) | 17322<br>(40.2) | 12445<br>(40.5) | 9020<br>(41.0)  | 6782<br>(41.5) |
| University | 7367<br>(4.7)   | 10942<br>(4.8)   | 8023<br>(5.3)   | 5719<br>(5.3)   | 4421<br>(5.5)   | 3209<br>(5.4)   | 2311<br>(5.4)   | 1670<br>(5.4)   | 1193<br>(5.4)   | 902<br>(5.5)   |
| Unknown    | 5241<br>(3.4)   | 7610<br>(3.3)    | 5248<br>(3.5)   | 3807<br>(3.5)   | 2792<br>(3.5)   | 2053<br>(3.5)   | 1513<br>(3.5)   | 1071<br>(3.5)   | 800<br>(3.6)    | 663<br>(4.1)   |

---

**Table S2.** Rates of maternal outcomes according to interpregnancy interval in a cohort of 894,476 women delivering two consecutive infants 1990-2009.

| Interval (months) | Maternal Death        | Postpartum Haemorrhage | Preeclampsia           | Eclampsia             | Puerperal Infection   |
|-------------------|-----------------------|------------------------|------------------------|-----------------------|-----------------------|
| 3-11              | 69/144694<br>(0.05%)  | 258/29673<br>(0.87%)   | 3573/132442<br>(2.70%) | 158/132105<br>(0.12%) | 376/130725<br>(0.29%) |
| 12-23             | 101/213744<br>(0.05%) | 571/57000<br>(1.00%)   | 5471/195685<br>(2.80%) | 288/195153<br>(0.15%) | 540/192717<br>(0.28%) |
| 24-35             | 70/142393<br>(0.05%)  | 489/45529<br>(1.07%)   | 4082/129645<br>(3.15%) | 172/129273<br>(0.13%) | 290/127645<br>(0.23%) |
| 36-47             | 58/101641<br>(0.06%)  | 381/36852<br>(1.03%)   | 3147/92713<br>(3.41%)  | 124/91829<br>(0.14%)  | 212/90653<br>(0.23%)  |
| 48-59             | 29/76014<br>(0.04%)   | 343/29573<br>(1.16%)   | 2589/68814<br>(3.76%)  | 121/68521<br>(0.18%)  | 170/67597<br>(0.25%)  |
| 60-71             | 25/56182<br>(0.04%)   | 254/22205<br>(1.14%)   | 2114/50294<br>(4.20%)  | 84/50069<br>(0.17%)   | 140/49384<br>(0.28%)  |
| 72-83             | 11/40919<br>(0.03%)   | 207/16219<br>(1.28%)   | 1731/36728<br>(4.71%)  | 73/36525<br>(0.20%)   | 91/36023<br>(0.25%)   |
| 84-95             | 16/29116<br>(0.05%)   | 133/11483<br>(1.16%)   | 1326/25947<br>(5.11%)  | 47/25816<br>(0.18%)   | 71/25389<br>(0.28%)   |
| 96-107            | 17/20874<br>(0.08%)   | 87/7961<br>(1.09%)     | 1030/18593<br>(5.54%)  | 42/18508<br>(0.23%)   | 51/18205<br>(0.28%)   |
| 108-119           | 5/15409<br>(0.03%)    | 59/5695<br>(1.04%)     | 876/13831<br>(6.33%)   | 31/13737<br>(0.23%)   | 32/13518<br>(0.24%)   |

**Table S3.** Rates of adverse perinatal outcomes according to interpregnancy interval in a cohort of 894,476 women delivering two consecutive infants 1990-2009.

| Interval (months) | Fetal Death            | Neonatal Death         | Preterm (<37 weeks)      | Low Birth Weight (<2500 g) |
|-------------------|------------------------|------------------------|--------------------------|----------------------------|
| 3-11              | 5251/153802<br>(3.41%) | 1055/130964<br>(0.81%) | 20612/148011<br>(14.00%) | 15685/149261<br>(10.51%)   |
| 12-23             | 7761/225282<br>(3.45%) | 1307/193402<br>(0.68%) | 26719/216721<br>(12.33%) | 21144/217266<br>(9.73%)    |
| 24-35             | 5504/148982<br>(3.69%) | 826/127900<br>(0.65%)  | 17376/143634<br>(12.10%) | 13796/142595<br>(9.67%)    |
| 36-47             | 3975/105685<br>(3.76%) | 574/91271<br>(0.63%)   | 11874/102180<br>(11.62%) | 9242/100946<br>(9.16%)     |
| 48-59             | 3047/78788<br>(3.87%)  | 384/68118<br>(0.56%)   | 8852/76270<br>(11.61%)   | 6783/75477<br>(8.99%)      |
| 60-71             | 2263/58231<br>(3.89%)  | 290/50228<br>(0.58%)   | 6516/56314<br>(11.57%)   | 5042/55817<br>(9.03%)      |
| 72-83             | 1728/42392<br>(4.08%)  | 224/36508<br>(0.61%)   | 4978/41056<br>(12.12%)   | 3832/40594<br>(9.44%)      |
| 84-95             | 1266/30127<br>(4.20%)  | 137/25875<br>(0.53%)   | 3696/29122<br>(12.69%)   | 2862/28894<br>(9.91%)      |
| 96-107            | 1016/21626<br>(4.70%)  | 121/18387<br>(0.66%)   | 2844/20936<br>(13.58%)   | 2185/20763<br>(10.52%)     |
| 108-119           | 830/15968<br>(5.20%)   | 93/13418<br>(0.69%)    | 2251/15484<br>(14.54%)   | 1698/15313<br>(11.09%)     |
