# Supplementary material for: Interpregnancy interval and perinatal outcomes across Latin America from 1990 to 2009: a large multi‐country study
Source: PubMed Central journal article supplement (PMC4949506; doi:10.1111/1471-0528.13625), 2015-09-24
Supplement: BJO-123-730-s003.pdf [file BJO-123-730-s003.pdf]

**Appendix S1.** Multivariate logistic regression with complete case analysis (without multiple imputation for missing values).

Table 1A

Adjusted odds ratio (95% confidence interval) for different maternal outcomes according to interpregnancy interval in a cohort of 894,476 women delivering two consecutive infants 1990-2009.

| Interval (months) | Maternal Death <sup>a</sup> | Preeclampsia <sup>b</sup> | Eclampsia <sup>c</sup> | Puerperal Infection <sup>d</sup> |
|-------------------|-----------------------------|---------------------------|------------------------|----------------------------------|
| 3-11              | 1.24<br>(0.87-1.76)         | 0.99<br>(0.95-1.04)       | 0.81<br>(0.65-1.00)    | 0.98<br>(0.85-1.13)              |
| 12-23             | Ref                         | Ref                       | Ref                    | Ref                              |
| 24-35             | 1.16<br>(0.81-1.65)         | 1.08<br>(1.03-1.13)       | 0.93<br>(0.75-1.15)    | 0.79<br>(0.68-0.92)              |
| 36-47             | 1.20<br>(0.81-1.78)         | 1.14<br>(1.08-1.19)       | 0.89<br>(0.70-1.12)    | 0.84<br>(0.71-0.99)              |
| 48-59             | 0.81<br>(0.50-1.33)         | 1.18<br>(1.12-1.25)       | 1.08<br>(0.84-1.37)    | 0.91<br>(0.76-1.09)              |
| 60-71             | 0.99<br>(0.59-1.65)         | 1.25<br>(1.18-1.32)       | 0.96<br>(0.73-1.28)    | 1.06<br>(0.87-1.29)              |
| 72-83             | 0.67<br>(0.34-1.30)         | 1.32<br>(1.24-1.40)       | 1.24<br>(0.93-1.66)    | 0.94<br>(0.74-1.19)              |
| 84-95             | 1.10<br>(0.59-2.06)         | 1.40<br>(1.31-1.50)       | 1.12<br>(0.80-1.58)    | 1.10<br>(0.85-1.42)              |
| 96-107            | 1.35<br>(0.71-2.58)         | 1.44<br>(1.34-1.55)       | 1.26<br>(0.87-1.82)    | 0.96<br>(0.70-1.32)              |
| 108-119           | 0.65<br>(0.23-1.79)         | 1.55<br>(1.43-1.68)       | 1.21<br>(0.79-1.85)    | 0.79<br>(0.54-1.18)              |

Multivariable logistic regression used for each outcome as dependent variable and various interpregnancy intervals as independent variables, using the interval 12-23 months as reference. Cases used for analysis: Maternal death model 698960, missing cases 21.9%; preeclampsia model 725718, missing cases 18.9%; eclampsia model 725327, missing cases 18.9%; puerperal Infection model 716624, missing cases 19.9%.

<sup>a</sup>Covariates in final maternal death model: Maternal age, parity (coded 0, 1-3,  $\geq 4$ ), preeclampsia, eclampsia, hemorrhage in 3rd trimester, and previous early neonatal mortality (coded 0,  $\geq 1$ ).

<sup>b</sup>Covariates in final preeclampsia model: Maternal age, parity, diabetes, urinary infection, and previous early neonatal mortality.

<sup>c</sup>Covariates in final eclampsia model: Maternal age, parity, diabetes, urinary infection, previous early neonatal mortality, and previous caesarean.

<sup>d</sup>Covariates in final puerperal infection model: Maternal age, parity, diabetes, preeclampsia, urinary infection, hemorrhage in 1st, 2nd, 3rd trimester and previous early neonatal mortality, and previous caesarean.

Table 1B

Adjusted odd ratios (95% confidence interval) for different perinatal outcomes according to interpregnancy interval in a cohort of 894,476 women delivering two consecutive infants 1990-2009.

| <b>Interval (months)</b> | <b>Fetal Death</b>  | <b>Neonatal Death</b> | <b>Low Birth Weight</b> | <b>Preterm birth</b> |
|--------------------------|---------------------|-----------------------|-------------------------|----------------------|
| 3-11                     | 1.01<br>(0.96-1.06) | 1.19<br>(1.09-1.30)   | 1.07<br>(1.04-1.10)     | 1.17<br>(1.14-1.19)  |
| 12-23                    | Ref                 | Ref                   | Ref                     | Ref                  |
| 24-35                    | 1.00<br>(0.94-1.05) | 0.99<br>(0.89-1.08)   | 1.00<br>(0.98-1.03)     | 0.96<br>(0.94-0.99)  |
| 36-47                    | 0.97<br>(0.91-1.03) | 1.03<br>(0.92-1.14)   | 0.95<br>(0.92-0.97)     | 0.92<br>(0.90-0.95)  |
| 48-59                    | 0.97<br>(0.91-1.04) | 0.87<br>(0.77-0.99)   | 0.92<br>(0.89-0.95)     | 0.90<br>(0.88-0.93)  |
| 60-71                    | 0.91<br>(0.85-0.98) | 0.93<br>(0.80-1.07)   | 0.92<br>(0.89-0.96)     | 0.89<br>(0.86-0.92)  |
| 72-83                    | 0.91<br>(0.84-0.99) | 1.00<br>(0.86-1.18)   | 0.97<br>(0.93-1.01)     | 0.94<br>(0.91-0.98)  |
| 84-95                    | 0.94<br>(0.86-1.04) | 0.84<br>(0.69-1.02)   | 1.00<br>(0.95-1.05)     | 0.99<br>(0.94-1.03)  |
| 96-107                   | 0.99<br>(0.89-1.10) | 1.02<br>(0.82-1.25)   | 1.06<br>(1.00-1.12)     | 1.05<br>(1.00-1.11)  |
| 108-119                  | 1.14<br>(1.01-1.28) | 1.07<br>(0.85-1.36)   | 1.13<br>(1.07-1.21)     | 1.11<br>(1.05-1.18)  |

Multivariable logistic regression used for each outcome as dependent variable and various interpregnancy intervals as independent variables, using the interval 12-23 months as reference. Cases used for analysis: Fetal death model 715606, missing cases 20.0%; neonatal death model 630032, missing cases 29.6%; low birth weight model 621214, missing cases 30.5%; preterm birth model 696919, missing cases 22.1%. Covariates in all final models: Maternal age, parity (coded 0, 1-3,  $\geq 4$ ), diabetes, preeclampsia, eclampsia, urinary infection, hemorrhage at 1st, 2nd and 3rd trimesters, and previous early neonatal mortality (coded 0,  $\geq 1$ ) and previous caesarean (coded 0,  $\geq 1$ ).
